# Supplementary material for: The Usefulness of Resistant Maltodextrin and Chitosan Oligosaccharide in Management of Gut Leakage and Microbiota in Chronic Kidney Disease
Source: MDPI journal article supplement (doi:10.3390/nu15153363), 2023-07-28
Supplement: s1 [file s1]

Supplementary

**Table S1.** Estimated creatinine clearance calculated from serum creatinine by ACRALA  
(<https://idal.uv.es/aclara/>)

|                         | Control   | CKD        | Inulin     | COS       | RMD       |
|-------------------------|-----------|------------|------------|-----------|-----------|
| eClCr (mL/min)          | 3.80±0.42 | 2.24±0.97* | 2.05±0.81* | 2.86±0.72 | 2.41±1.17 |
| (estimate) % of control |           | 58.9%      | 53.9%      | 75.3%     | 63.4%     |

\*P<0.05 compared with Control

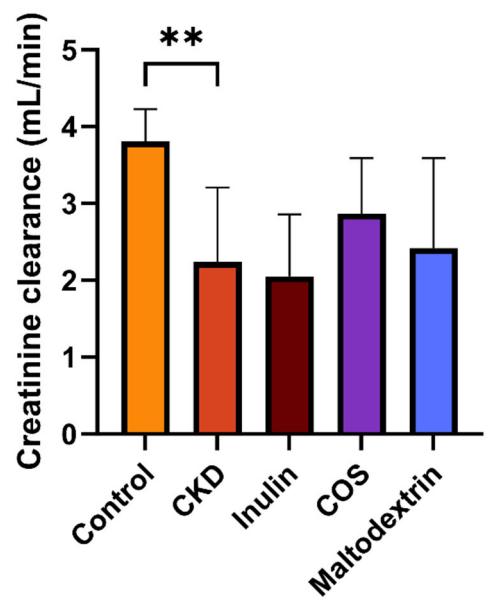

**Figure S1.** Estimated creatinine clearance calculated from serum creatinine by ACRALA  
(<https://idal.uv.es/aclara/>)
